# Supplementary material for: Non-infectious comorbidity in patients with multiple sclerosis: A national cohort study in Sweden
Source: PubMed Central journal article supplement — Mult Scler J Exp Transl Clin. 2020 Aug 14;6(3):2055217320947761. doi: 10.1177/2055217320947761 (PMC7430080; doi:10.1177/2055217320947761), 2020-08-14
Supplement: sj-pdf-1-mso-10.1177_2055217320947761.pdf [file sj-pdf-1-mso-10.1177_2055217320947761.pdf]

**Supplemental Table 1a. The risk of incident cardiovascular comorbidity, stratified by sex and age, after diagnosis of multiple sclerosis (MS) compared with MS-free matched individuals, in a national, register-based cohort study in Sweden 2008-2016**

|                                             | MS-patients<br>N=6602 |                  |                           | MS-free individuals<br>N=61628 |                  |                          |                   |
|---------------------------------------------|-----------------------|------------------|---------------------------|--------------------------------|------------------|--------------------------|-------------------|
|                                             | Events                | Person-<br>years | IR (95% CI) <sup>a</sup>  | Events                         | Person-<br>years | IR (95% CI) <sup>a</sup> | IRR (95% CI)      |
| <b>MACE</b>                                 | 75                    | 31099.2          | 24.12 (18.66-29.57)       | 501                            | 295936.5         | 16.93 (15.45-18.41)      | 1.42 (1.12-1.82)  |
| Female                                      | 43                    | 21509.2          | 19.99 (14.02-25.97)       | 246                            | 204828.6         | 12.01 (10.51-13.51)      | 1.66 (1.20-2.30)  |
| Male                                        | 32                    | 9590.0           | 33.37 (21.81-44.93)       | 255                            | 91108.0          | 27.99 (24.55-31.42)      | 1.19 (0.83-1.72)  |
| Age <40                                     | n < 10                | 15524.7          | 5.15 (2.22-10.15)         | 22                             | 130761.3         | 1.68 (1.05-2.55)         | 3.06 (1.36-6.88)  |
| Age 40-59                                   | 30                    | 12855.4          | 23.34 (14.99-31.69)       | 215                            | 131621.0         | 16.33 (14.15-18.52)      | 1.43 (0.98-2.09)  |
| Age ≥ 60                                    | 37                    | 2719.0           | 136.08 (92.23-<br>179.93) | 264                            | 33554.2          | 78.68 (69.19-88.17)      | 1.73 (1.23-2.44)  |
| <b>Myocardial infarction</b>                | 35                    | 31853.3          | 10.99 (7.35-14.63)        | 252                            | 298201.0         | 8.45 (7.41-9.49)         | 1.30 (0.91-1.85)  |
| Female                                      | 17                    | 21978.2          | 7.73 (4.51-12.38)         | 100                            | 206127.7         | 4.85 (3.90-5.80)         | 1.59 (0.95-2.67)  |
| Male                                        | 18                    | 9875.0           | 18.23 (10.80-28.81)       | 152                            | 92073.4          | 16.51 (13.88-19.13)      | 1.10 (0.68-1.80)  |
| Age <40                                     | n < 10                | 15654.7          | 1.28 (0.15-4.62)          | n < 10                         | 130979.8         | 0.15 (0.02-0.55)         | 8.37 (1.18-59.40) |
| Age 40-59                                   | 15                    | 13251.5          | 11.32 (6.34-18.67)        | 112                            | 132693.8         | 8.44 (6.88-10.00)        | 1.34 (0.78-2.30)  |
| Age ≥ 60                                    | 18                    | 2947.0           | 61.08 (36.20-96.53)       | 138                            | 34527.5          | 39.97 (33.30-46.64)      | 1.53 (0.94-2.50)  |
| <b>Stroke, hemorrhagic<br/>and ischemic</b> | 42                    | 31332.1          | 13.40 (9.35-17.46)        | 274                            | 298188.4         | 9.19 (8.10-10.28)        | 1.46 (1.05-2.02)  |
| Female                                      | 27                    | 21615.2          | 12.49 (8.23-18.17)        | 156                            | 205592.1         | 7.59 (6.40-8.78)         | 1.65 (1.09-2.48)  |
| Male                                        | 15                    | 9716.9           | 15.44 (8.64-25.46)        | 118                            | 92596.3          | 12.74 (10.44-15.04)      | 1.21 (0.71-2.07)  |
| Age <40                                     | n < 10                | 15533.1          | 3.86 (1.42-8.41)          | 19                             | 130815.2         | 1.45 (0.87-2.27)         | 2.66 (1.06-6.66)  |
| Age 40-59                                   | 15                    | 12995.5          | 11.54 (6.46-19.04)        | 108                            | 132659.8         | 8.14 (6.61-9.68)         | 1.42 (0.83-2.43)  |
| Age ≥ 60                                    | 21                    | 2803.5           | 74.91 (46.37-114.50)      | 147                            | 34713.4          | 42.35 (35.50-49.19)      | 1.77 (1.12-2.79)  |
| <b>Transient Ischemic<br/>attack</b>        | 26                    | 31887.5          | 8.15 (5.33-11.95)         | 148                            | 299505.0         | 4.94 (4.15-5.74)         | 1.65 (1.09-2.50)  |
| Female                                      | 21                    | 21945.5          | 9.57 (5.92-14.63)         | 93                             | 206277.7         | 4.51 (3.59-5.42)         | 2.12 (1.32-3.41)  |
| Male                                        | n < 10                | 9942.0           | 5.03 (1.63-11.74)         | 55                             | 93227.3          | 5.90 (4.34-7.46)         | 0.85 (0.34-2.13)  |
| Age <40                                     | n < 10                | 15609.1          | 2.56 (0.70-6.56)          | n < 10                         | 130959.4         | 0.46 (0.17-1.00)         | 5.59 (1.58-19.82) |

|                                                                 | MS-patients<br>N=6602 |                  |                          | MS-free individuals<br>N=61628 |                  |                          |                  |
|-----------------------------------------------------------------|-----------------------|------------------|--------------------------|--------------------------------|------------------|--------------------------|------------------|
|                                                                 | Events                | Person-<br>years | IR (95% CI) <sup>a</sup> | Events                         | Person-<br>years | IR (95% CI) <sup>a</sup> | IRR (95% CI)     |
| Age 40-59                                                       | 11                    | 13306.1          | 8.27 (4.13-14.79)        | 58                             | 133254.9         | 4.35 (3.23-5.47)         | 1.90 (1.00-3.62) |
| Age >= 60                                                       | 11                    | 2972.2           | 37.01 (18.47-66.22)      | 84                             | 35290.7          | 23.80 (18.71-28.89)      | 1.55 (0.83-2.91) |
| <b>Angina pectoris &amp; unspecified ischemic heart disease</b> |                       |                  |                          |                                |                  |                          |                  |
|                                                                 | 24                    | 31732.8          | 7.56 (4.85-11.25)        | 263                            | 296805.8         | 8.86 (7.79-9.93)         | 0.85 (0.56-1.30) |
| Female                                                          | 10                    | 21896.2          | 4.57 (2.19-8.40)         | 121                            | 205050.7         | 5.90 (4.85-6.95)         | 0.77 (0.41-1.47) |
| Male                                                            | 14                    | 9836.6           | 14.23 (7.78-23.88)       | 142                            | 91755.1          | 15.48 (12.93-18.02)      | 0.92 (0.53-1.59) |
| Age <40                                                         | 0                     | 15663.1          | 0.00 (N/A)               | n < 10                         | 130969.9         | 0.23 (0.05-0.67)         | N/A              |
| Age 40-59                                                       | 14                    | 13212.2          | 10.60 (5.79-17.78)       | 107                            | 132255.3         | 8.09 (6.56-9.62)         | 1.31 (0.75-2.29) |
| Age >= 60                                                       | 10                    | 2857.6           | 34.99 (16.78-64.36)      | 153                            | 33580.6          | 45.56 (38.34-52.78)      | 0.77 (0.41-1.46) |
| <b>Heart failure</b>                                            |                       |                  |                          |                                |                  |                          |                  |
|                                                                 | 49                    | 31885.7          | 15.37 (11.06-19.67)      | 296                            | 298764.6         | 9.91 (8.78-11.04)        | 1.55 (1.15-2.10) |
| Female                                                          | 22                    | 22001.3          | 10.00 (6.27-15.14)       | 155                            | 206097.5         | 7.52 (6.34-8.70)         | 1.33 (0.85-2.08) |
| Male                                                            | 27                    | 9884.4           | 27.32 (18.00-39.74)      | 141                            | 92667.1          | 15.22 (12.70-17.73)      | 1.80 (1.19-2.71) |
| Age <40                                                         | n < 10                | 15627.2          | 3.20 (1.04-7.47)         | 13                             | 130912.4         | 0.99 (0.53-1.70)         | 3.22 (1.15-9.04) |
| Age 40-59                                                       | 16                    | 13349.2          | 11.99 (6.85-19.46)       | 85                             | 133048.3         | 6.39 (5.03-7.75)         | 1.88 (1.10-3.20) |
| Age >= 60                                                       | 28                    | 2909.3           | 96.24 (63.95-139.10)     | 198                            | 34803.9          | 56.89 (48.97-64.81)      | 1.69 (1.14-2.51) |
| <b>Venous thromboembolism</b>                                   |                       |                  |                          |                                |                  |                          |                  |
|                                                                 | 93                    | 31824.0          | 29.22 (23.28-35.16)      | 615                            | 298960.6         | 20.57 (18.95-22.20)      | 1.42 (1.14-1.77) |
| Female                                                          | 60                    | 21899.4          | 27.40 (20.47-34.33)      | 418                            | 205876.4         | 20.30 (18.36-22.25)      | 1.35 (1.03-1.77) |
| Male                                                            | 33                    | 9924.6           | 33.25 (21.91-44.60)      | 197                            | 93084.2          | 21.16 (18.21-24.12)      | 1.57 (1.09-2.27) |
| Age <40                                                         | 19                    | 15573.6          | 12.20 (7.35-19.05)       | 131                            | 130434.9         | 10.04 (8.32-11.76)       | 1.21 (0.75-1.97) |
| Age 40-59                                                       | 43                    | 13210.0          | 32.55 (22.82-42.28)      | 291                            | 133009.8         | 21.88 (19.36-24.39)      | 1.49 (1.08-2.05) |
| Age >= 60                                                       | 31                    | 3040.4           | 101.96 (66.07-137.85)    | 193                            | 35515.9          | 54.34 (46.68-62.01)      | 1.88 (1.28-2.74) |
| <b>Peripheral vascular disease</b>                              |                       |                  |                          |                                |                  |                          |                  |
|                                                                 | 13                    | 31960.4          | 4.07 (2.17-6.96)         | 90                             | 299851.4         | 3.00 (2.38-3.62)         | 1.36 (0.76-2.42) |
| Female                                                          | n < 10                | 21988.0          | 4.09 (1.87-7.77)         | 63                             | 206431.0         | 3.05 (2.30-3.81)         | 1.34 (0.67-2.70) |
| Male                                                            | n < 10                | 9972.4           | 4.01 (1.09-10.27)        | 27                             | 93420.4          | 2.89 (1.90-4.21)         | 1.39 (0.49-3.97) |

|                                               | MS-patients<br>N=6602 |                  |                          | MS-free individuals<br>N=61628 |                  |                          |                   |
|-----------------------------------------------|-----------------------|------------------|--------------------------|--------------------------------|------------------|--------------------------|-------------------|
|                                               | Events                | Person-<br>years | IR (95% CI) <sup>a</sup> | Events                         | Person-<br>years | IR (95% CI) <sup>a</sup> | IRR (95% CI)      |
| Age <40                                       | n < 10                | 15623.8          | 1.28 (0.16-4.62)         | 13                             | 130852.3         | 0.99 (0.53-1.70)         | 1.29 (0.29-5.71)  |
| Age 40-59                                     | n < 10                | 13308.0          | 5.26 (2.11-10.84)        | 33                             | 133437.8         | 2.47 (1.63-3.32)         | 2.13 (0.94-4.81)  |
| Age ≥ 60                                      | n < 10                | 3028.5           | 13.21 (3.60-33.82)       | 44                             | 35561.3          | 12.37 (8.72-16.03)       | 1.07 (0.38-2.97)  |
| <b>Pericardial disease</b>                    | 12                    | 32025.8          | 3.75 (1.94-6.55)         | 62                             | 299946.7         | 2.07 (1.55-2.58)         | 1.81 (0.98-3.36)  |
| Female                                        | n < 10                | 22073.1          | 1.81 (0.49-4.64)         | 33                             | 206649.2         | 1.60 (1.05-2.14)         | 1.13 (0.40-3.20)  |
| Male                                          | n < 10                | 9952.7           | 8.04 (3.47-15.84)        | 29                             | 93297.5          | 3.11 (2.08-4.46)         | 2.59 (1.18-5.66)  |
| Age <40                                       | n < 10                | 15612.3          | 1.92 (0.40-5.62)         | 11                             | 130803.2         | 0.84 (0.42-1.50)         | 2.28 (0.64-8.19)  |
| Age 40-59                                     | n < 10                | 13375.6          | 5.98 (2.58-11.79)        | 32                             | 133465.7         | 2.40 (1.57-3.23)         | 2.49 (1.15-5.41)  |
| Age ≥ 60                                      | n < 10                | 3037.9           | 3.29 (0.08-18.34)        | 19                             | 35677.8          | 5.33 (3.21-8.32)         | 0.62 (0.08-4.62)  |
| <b>Bradycardia and heart block</b>            | 13                    | 32039.8          | 4.06 (2.16-6.94)         | 76                             | 300081.5         | 2.53 (1.96-3.10)         | 1.60 (0.89-2.89)  |
| Female                                        | n < 10                | 22046.3          | 3.63 (1.57-7.15)         | 36                             | 206686.7         | 1.74 (1.17-2.31)         | 2.08 (0.97-4.48)  |
| Male                                          | n < 10                | 9993.6           | 5.00 (1.62-11.68)        | 40                             | 93394.7          | 4.28 (2.96-5.61)         | 1.17 (0.46-2.96)  |
| Age <40                                       | n < 10                | 15641.6          | 2.56 (0.70-6.55)         | n < 10                         | 130956.1         | 0.53 (0.21-1.10)         | 4.78 (1.40-16.34) |
| Age 40-59                                     | n < 10                | 13367.0          | 3.74 (1.21-8.73)         | 24                             | 133549.5         | 1.80 (1.15-2.67)         | 2.08 (0.79-5.46)  |
| Age ≥ 60                                      | n < 10                | 3031.2           | 13.20 (3.60-33.79)       | 45                             | 35575.9          | 12.65 (8.95-16.34)       | 1.04 (0.38-2.90)  |
| <b>Paroxysmal tachycardia</b>                 | 19                    | 31922.8          | 5.95 (3.58-9.29)         | 165                            | 298807.1         | 5.52 (4.68-6.36)         | 1.08 (0.67-1.73)  |
| Female                                        | 12                    | 21971.1          | 5.46 (2.82-9.54)         | 112                            | 205651.1         | 5.45 (4.44-6.45)         | 1.00 (0.55-1.82)  |
| Male                                          | n < 10                | 9951.7           | 7.03 (2.83-14.49)        | 53                             | 93156.0          | 5.69 (4.16-7.22)         | 1.24 (0.56-2.72)  |
| Age <40                                       | n < 10                | 15609.9          | 3.84 (1.41-8.37)         | 36                             | 130520.5         | 2.76 (1.86-3.66)         | 1.39 (0.59-3.31)  |
| Age 40-59                                     | n < 10                | 13296.9          | 6.77 (3.09-12.85)        | 74                             | 132908.9         | 5.57 (4.30-6.84)         | 1.22 (0.61-2.43)  |
| Age ≥ 60                                      | n < 10                | 3016.0           | 13.26 (3.61-33.96)       | 55                             | 35377.8          | 15.55 (11.44-19.66)      | 0.85 (0.31-2.35)  |
| <b>Atrial fibrillation and atrial flutter</b> | 41                    | 31777.8          | 12.90 (8.95-16.85)       | 466                            | 296945.3         | 15.69 (14.27-17.12)      | 0.82 (0.60-1.13)  |
| Female                                        | 21                    | 21938.2          | 9.57 (5.93-14.63)        | 217                            | 205417.6         | 10.56 (9.16-11.97)       | 0.91 (0.58-1.42)  |
| Male                                          | 20                    | 9839.6           | 20.33 (12.42-31.39)      | 249                            | 91527.7          | 27.20 (23.83-30.58)      | 0.75 (0.47-1.18)  |
| Age <40                                       | n < 10                | 15611.2          | 2.56 (0.70-6.56)         | 18                             | 130752.5         | 1.38 (0.82-2.18)         | 1.86 (0.63-5.50)  |

|                          | <b>MS-patients<br/>N=6602</b> |                          |                                | <b>MS-free individuals<br/>N=61628</b> |                          |                                |                     |
|--------------------------|-------------------------------|--------------------------|--------------------------------|----------------------------------------|--------------------------|--------------------------------|---------------------|
|                          | <b>Events</b>                 | <b>Person-<br/>years</b> | <b>IR (95% CI)<sup>a</sup></b> | <b>Events</b>                          | <b>Person-<br/>years</b> | <b>IR (95% CI)<sup>a</sup></b> | <b>IRR (95% CI)</b> |
| Age 40-59                | 10                            | 13225.6                  | 7.56 (3.63-13.91)              | 132                                    | 132258.9                 | 9.98 (8.28-11.68)              | 0.76 (0.40-1.44)    |
| Age >= 60                | 27                            | 2940.9                   | 91.81 (60.50-133.57)           | 316                                    | 33933.8                  | 93.12 (82.85-103.39)           | 0.99 (0.67-1.46)    |
| <b>Other arrhythmias</b> | 37                            | 31823.2                  | 11.63 (7.88-15.37)             | 309                                    | 297570.2                 | 10.38 (9.23-11.54)             | 1.12 (0.80-1.57)    |
| Female                   | 27                            | 21894.4                  | 12.33 (8.13-17.94)             | 218                                    | 204820.4                 | 10.64 (9.23-12.06)             | 1.16 (0.78-1.73)    |
| Male                     | 10                            | 9928.9                   | 10.07 (4.83-18.52)             | 91                                     | 92749.8                  | 9.81 (7.80-11.83)              | 1.03 (0.53-1.97)    |
| Age <40                  | n < 10                        | 15563.4                  | 5.78 (2.64-10.98)              | 68                                     | 130064.8                 | 5.23 (3.99-6.47)               | 1.11 (0.55-2.22)    |
| Age 40-59                | 15                            | 13266.4                  | 11.31 (6.33-18.65)             | 155                                    | 132312.2                 | 11.71 (9.87-13.56)             | 0.97 (0.57-1.64)    |
| Age >= 60                | 13                            | 2993.4                   | 43.43 (23.12-74.26)            | 86                                     | 35193.1                  | 24.44 (19.27-29.60)            | 1.78 (0.99-3.18)    |

<sup>a</sup>Per 10,000 person-years; **crude IR and IRR**. CI: confidence interval; IR: incidence rate; IRR: incidence rate ratio; MACE: major adverse cardiovascular events; N/A: not applicable

**Supplemental Table 1b. The risk of incident non-infectious, non-cardiovascular comorbidity, stratified by sex and age, after diagnosis of multiple sclerosis (MS) compared with MS-free matched individuals, in a national, register-based cohort study in Sweden 2008-2016**

|                                               | MS-patients<br>N=6602 |                  |                            | MS-free individuals<br>N=61628 |                  |                          |                        |
|-----------------------------------------------|-----------------------|------------------|----------------------------|--------------------------------|------------------|--------------------------|------------------------|
|                                               | Events                | Person-<br>years | IR (95% CI) <sup>a</sup>   | Events                         | Person-<br>years | IR (95% CI) <sup>a</sup> | IRR (95% CI)           |
| <b>Autoimmune disease</b>                     | 94                    | 31383.9          | 29.95 (23.90-36.01)        | 233                            | 297945.9         | 7.82 (6.82-8.82)         | 3.83 (3.01-4.87)       |
| Female                                        | 70                    | 21571.7          | 32.45 (24.85-40.05)        | 203                            | 204680.4         | 9.92 (8.55-11.28)        | 3.27 (2.49-4.29)       |
| Male                                          | 24                    | 9812.1           | 24.46 (15.67-36.39)        | 30                             | 93265.4          | 3.22 (2.07-4.37)         | 7.60 (4.45-13.01)      |
| Age <40                                       | 41                    | 15400.8          | 26.62 (18.47-34.77)        | 59                             | 130223.1         | 4.53 (3.37-5.69)         | 5.88 (3.94-8.75)       |
| Age 40-59                                     | 42                    | 13046.7          | 32.19 (22.46-41.93)        | 87                             | 132694.7         | 6.56 (5.18-7.93)         | 4.91 (3.40-7.10)       |
| Age ≥ 60                                      | 11                    | 2936.4           | 37.46 (18.70-67.03)        | 87                             | 35028.1          | 24.84 (19.62-30.06)      | 1.51 (0.81-2.82)       |
| <b>Bladder dysfunction,<br/>neuromuscular</b> | 334                   | 30603.5          | 109.14 (97.43-<br>120.84)  | 57                             | 299814.4         | 1.90 (1.41-2.39)         | 57.41 (43.35-76.02)    |
| Female                                        | 209                   | 21152.8          | 98.80 (85.41-112.20)       | 31                             | 206539.6         | 1.50 (0.97-2.03)         | 65.83 (45.14-96.00)    |
| Male                                          | 125                   | 9450.7           | 132.27 (109.08-<br>155.45) | 26                             | 93274.8          | 2.79 (1.82-4.08)         | 47.45 (31.10-72.40)    |
| Age <40                                       | 105                   | 15080.4          | 69.63 (56.31-82.94)        | 12                             | 130823.1         | 0.92 (0.47-1.60)         | 75.91 (41.77-137.93)   |
| Age 40-59                                     | 161                   | 12707.4          | 126.70 (107.13-<br>146.27) | 22                             | 133408.0         | 1.65 (1.03-2.50)         | 76.83 (49.21-119.95)   |
| Age ≥ 60                                      | 68                    | 2815.7           | 241.50 (184.10-<br>298.90) | 23                             | 35583.3          | 6.46 (4.10-9.70)         | 37.36 (23.29-59.95)    |
| <b>Optic neuritis</b>                         | 279                   | 26325.9          | 105.98 (93.54-<br>118.42)  | 12                             | 300458.7         | 0.40 (0.21-0.70)         | 265.35 (148.89-472.91) |
| Female                                        | 212                   | 17757.2          | 119.39 (103.32-<br>135.46) | n < 10                         | 206831.5         | 0.39 (0.17-0.76)         | 308.67 (152.37-625.27) |
| Male                                          | 67                    | 8568.7           | 78.19 (59.47-96.91)        | n < 10                         | 93627.2          | 0.43 (0.12-1.09)         | 183.02 (66.74-501.92)  |
| Age <40                                       | 169                   | 11781.2          | 143.45 (121.82-<br>165.08) | n < 10                         | 130981.8         | 0.38 (0.12-0.89)         | 375.78 (154.41-914.54) |
| Age 40-59                                     | 95                    | 11597.9          | 81.91 (65.44-98.38)        | n < 10                         | 133689.7         | 0.37 (0.12-0.87)         | 219.01 (89.11-538.32)  |

|                              | MS-patients<br>N=6602 |                  |                          | MS-free individuals<br>N=61628 |                  |                          |                      |
|------------------------------|-----------------------|------------------|--------------------------|--------------------------------|------------------|--------------------------|----------------------|
|                              | Events                | Person-<br>years | IR (95% CI) <sup>a</sup> | Events                         | Person-<br>years | IR (95% CI) <sup>a</sup> | IRR (95% CI)         |
| Age >= 60                    | 15                    | 2946.8           | 50.90 (28.49-83.96)      | n < 10                         | 35787.2          | 0.56 (0.07-2.02)         | 91.08 (20.83-398.30) |
| <b>Chronic renal disease</b> | 17                    | 32011.6          | 5.31 (3.09-8.50)         | 171                            | 299668.4         | 5.71 (4.85-6.56)         | 0.93 (0.57-1.53)     |
| Female                       | n < 10                | 22044.3          | 2.72 (1.00-5.92)         | 95                             | 206460.4         | 4.60 (3.68-5.53)         | 0.59 (0.26-1.35)     |
| Male                         | 11                    | 9967.3           | 11.04 (5.51-19.75)       | 76                             | 93208.0          | 8.15 (6.32-9.99)         | 1.35 (0.72-2.55)     |
| Age <40                      | n < 10                | 15643.7          | 1.92 (0.40-5.60)         | 19                             | 130808.7         | 1.45 (0.87-2.27)         | 1.32 (0.39-4.46)     |
| Age 40-59                    | n < 10                | 13362.4          | 6.74 (3.08-12.79)        | 54                             | 133296.2         | 4.05 (2.97-5.13)         | 1.66 (0.82-3.37)     |
| Age >= 60                    | n < 10                | 3005.6           | 16.64 (5.40-38.82)       | 98                             | 35563.5          | 27.56 (22.10-33.01)      | 0.60 (0.25-1.48)     |
| <b>Diabetes Type I</b>       | 15                    | 31665.3          | 4.74 (2.65-7.81)         | 141                            | 297111.8         | 4.75 (3.96-5.53)         | 1.00 (0.59-1.70)     |
| Female                       | 11                    | 21795.6          | 5.05 (2.52-9.03)         | 80                             | 204874.1         | 3.90 (3.05-4.76)         | 1.29 (0.69-2.43)     |
| Male                         | n < 10                | 9869.8           | 4.05 (1.10-10.38)        | 61                             | 92237.8          | 6.61 (4.95-8.27)         | 0.61 (0.22-1.69)     |
| Age <40                      | n < 10                | 15523.1          | 1.93 (0.40-5.65)         | 32                             | 129920.4         | 2.46 (1.61-3.32)         | 0.78 (0.24-2.56)     |
| Age 40-59                    | n < 10                | 13163.6          | 4.56 (1.67-9.92)         | 55                             | 132114.4         | 4.16 (3.06-5.26)         | 1.09 (0.47-2.54)     |
| Age >= 60                    | n < 10                | 2978.7           | 20.14 (7.39-43.84)       | 54                             | 35077.0          | 15.39 (11.29-19.50)      | 1.31 (0.56-3.04)     |
| <b>Diabetes Type II</b>      | 69                    | 31436.4          | 21.95 (16.77-27.13)      | 654                            | 294374.5         | 22.22 (20.51-23.92)      | 0.99 (0.77-1.27)     |
| Female                       | 34                    | 21702.7          | 15.67 (10.40-20.93)      | 369                            | 203510.8         | 18.13 (16.28-19.98)      | 0.86 (0.61-1.23)     |
| Male                         | 35                    | 9733.7           | 35.96 (24.04-47.87)      | 285                            | 90863.7          | 31.37 (27.72-35.01)      | 1.15 (0.81-1.63)     |
| Age <40                      | 10                    | 15549.6          | 6.43 (3.08-11.83)        | 56                             | 130399.2         | 4.29 (3.17-5.42)         | 1.50 (0.76-2.93)     |
| Age 40-59                    | 40                    | 13008.5          | 30.75 (21.22-40.28)      | 322                            | 130562.0         | 24.66 (21.97-27.36)      | 1.25 (0.90-1.73)     |
| Age >= 60                    | 19                    | 2878.3           | 66.01 (39.74-103.08)     | 276                            | 33413.3          | 82.60 (72.86-92.35)      | 0.80 (0.50-1.27)     |
| <b>Dyslipidemia</b>          | 67                    | 31390.5          | 21.34 (16.23-26.45)      | 701                            | 294553.7         | 23.80 (22.04-25.56)      | 0.90 (0.70-1.15)     |
| Female                       | 37                    | 21693.3          | 17.06 (11.56-22.55)      | 390                            | 203763.0         | 19.14 (17.24-21.04)      | 0.89 (0.64-1.25)     |
| Male                         | 30                    | 9697.2           | 30.94 (19.87-42.01)      | 311                            | 90790.6          | 34.25 (30.45-38.06)      | 0.90 (0.62-1.31)     |
| Age <40                      | n < 10                | 15600.5          | 1.28 (0.16-4.63)         | 28                             | 130692.7         | 2.14 (1.42-3.10)         | 0.60 (0.14-2.51)     |
| Age 40-59                    | 33                    | 12974.3          | 25.43 (16.76-34.11)      | 324                            | 130721.8         | 24.79 (22.09-27.48)      | 1.03 (0.72-1.47)     |
| Age >= 60                    | 32                    | 2815.7           | 113.65 (74.27-153.03)    | 349                            | 33139.2          | 105.31 (94.26-116.36)    | 1.08 (0.75-1.55)     |
| <b>Retinal disorders</b>     | 112                   | 30961.6          | 36.17 (29.47-42.87)      | 606                            | 295619.1         | 20.50 (18.87-22.13)      | 1.76 (1.44-2.16)     |

|                                                  | MS-patients<br>N=6602 |                  |                           | MS-free individuals<br>N=61628 |                  |                           |                  |
|--------------------------------------------------|-----------------------|------------------|---------------------------|--------------------------------|------------------|---------------------------|------------------|
|                                                  | Events                | Person-<br>years | IR (95% CI) <sup>a</sup>  | Events                         | Person-<br>years | IR (95% CI) <sup>a</sup>  | IRR (95% CI)     |
| Female                                           | 75                    | 21355.1          | 35.12 (27.17-43.07)       | 408                            | 203722.2         | 20.03 (18.08-21.97)       | 1.75 (1.37-2.24) |
| Male                                             | 37                    | 9606.5           | 38.52 (26.11-50.93)       | 198                            | 91896.9          | 21.55 (18.54-24.55)       | 1.79 (1.26-2.54) |
| Age <40                                          | 25                    | 15319.1          | 16.32 (10.56-24.09)       | 48                             | 130228.9         | 3.69 (2.64-4.73)          | 4.43 (2.73-7.18) |
| Age 40-59                                        | 43                    | 12912.2          | 33.30 (23.35-43.26)       | 178                            | 131696.1         | 13.52 (11.53-15.50)       | 2.46 (1.77-3.44) |
| Age >= 60                                        | 44                    | 2730.3           | 161.16(113.54-<br>208.77) | 380                            | 33694.1          | 112.78(101.44-<br>124.12) | 1.43 (1.05-1.95) |
| <b>Asthma</b>                                    | 93                    | 30971.2          | 30.03 (23.92-36.13)       | 674                            | 290583.9         | 23.19 (21.44-24.95)       | 1.29 (1.04-1.61) |
| Female                                           | 70                    | 21222.4          | 32.98 (25.26-40.71)       | 523                            | 199186.4         | 26.26 (24.01-28.51)       | 1.26 (0.98-1.61) |
| Male                                             | 23                    | 9748.8           | 23.59 (14.96-35.40)       | 151                            | 91397.5          | 16.52 (13.89-19.16)       | 1.43 (0.92-2.21) |
| Age <40                                          | 33                    | 15045.0          | 21.93 (14.45-29.42)       | 249                            | 125852.8         | 19.79 (17.33-22.24)       | 1.11 (0.77-1.59) |
| Age 40-59                                        | 46                    | 12954.4          | 35.51 (25.25-45.77)       | 320                            | 130035.4         | 24.61 (21.91-27.30)       | 1.44 (1.06-1.97) |
| Age >= 60                                        | 14                    | 2971.8           | 47.11 (25.76-79.04)       | 105                            | 34695.8          | 30.26 (24.47-36.05)       | 1.56 (0.89-2.72) |
| <b>Chronic Obstructive<br/>Pulmonary Disease</b> | 38                    | 31874.4          | 11.92 (8.13-15.71)        | 290                            | 298635.3         | 9.71 (8.59-10.83)         | 1.23 (0.88-1.72) |
| Female                                           | 19                    | 21963.0          | 8.65 (5.21-13.51)         | 198                            | 205617.5         | 9.63 (8.29-10.97)         | 0.90 (0.56-1.44) |
| Male                                             | 19                    | 9911.4           | 19.17 (11.54-29.94)       | 92                             | 93017.8          | 9.89 (7.87-11.91)         | 1.94 (1.18-3.18) |
| Age <40                                          | 0                     | 15655.1          | 0.00 (N/A)                | n < 10                         | 130952.9         | 0.46 (0.17-1.00)          | N/A              |
| Age 40-59                                        | 15                    | 13252.8          | 11.32 (6.33-18.67)        | 98                             | 132820.3         | 7.38 (5.92-8.84)          | 1.53 (0.89-2.64) |
| Age >= 60                                        | 23                    | 2966.5           | 77.53 (49.15-116.34)      | 186                            | 34862.1          | 53.35 (45.69-61.02)       | 1.45 (0.94-2.24) |
| <b>Bowel dysfunction</b>                         | 217                   | 30394.1          | 71.40 (61.90-80.89)       | 960                            | 290499.7         | 33.05 (30.96-35.14)       | 2.16 (1.86-2.50) |
| Female                                           | 158                   | 20747.6          | 76.15 (64.28-88.03)       | 732                            | 198805.5         | 36.82 (34.15-39.49)       | 2.07 (1.74-2.46) |
| Male                                             | 59                    | 9646.5           | 61.16 (45.56-76.77)       | 228                            | 91694.2          | 24.87 (21.64-28.09)       | 2.46 (1.85-3.28) |
| Age <40                                          | 78                    | 14831.3          | 52.59 (40.92-64.26)       | 373                            | 126122.6         | 29.57 (26.57-32.58)       | 1.78 (1.39-2.27) |
| Age 40-59                                        | 91                    | 12642.2          | 71.98 (57.19-86.77)       | 369                            | 129700.5         | 28.45 (25.55-31.35)       | 2.53 (2.01-3.18) |
| Age >= 60                                        | 48                    | 2920.6           | 164.35(117.86-<br>210.85) | 218                            | 34676.6          | 62.87 (54.52-71.21)       | 2.61 (1.91-3.57) |
| <b>Crohn disease</b>                             | 11                    | 31909.9          | 3.45 (1.72-6.17)          | 84                             | 298976.1         | 2.81 (2.21-3.41)          | 1.23 (0.65-2.30) |
| Female                                           | n < 10                | 21967.9          | 3.19 (1.28-6.57)          | 63                             | 205733.6         | 3.06 (2.31-3.82)          | 1.04 (0.48-2.27) |

|                           | MS-patients<br>N=6602 |                  |                          | MS-free individuals<br>N=61628 |                  |                          |                  |
|---------------------------|-----------------------|------------------|--------------------------|--------------------------------|------------------|--------------------------|------------------|
|                           | Events                | Person-<br>years | IR (95% CI) <sup>a</sup> | Events                         | Person-<br>years | IR (95% CI) <sup>a</sup> | IRR (95% CI)     |
| Male                      | n < 10                | 9941.9           | 4.02 (1.10-10.30)        | 21                             | 93242.5          | 2.25 (1.39-3.44)         | 1.79 (0.61-5.20) |
| Age <40                   | n < 10                | 15559.6          | 3.21 (1.04-7.50)         | 43                             | 130303.4         | 3.30 (2.31-4.29)         | 0.97 (0.39-2.46) |
| Age 40-59                 | n < 10                | 13322.0          | 3.75 (1.22-8.76)         | 26                             | 133023.7         | 1.95 (1.28-2.86)         | 1.92 (0.74-5.00) |
| Age >= 60                 | n < 10                | 3028.3           | 3.30 (0.08-18.40)        | 15                             | 35649.0          | 4.21 (2.36-6.94)         | 0.78 (0.10-5.94) |
| <b>Ulcerative colitis</b> | 21                    | 31838.0          | 6.60 (4.08-10.08)        | 147                            | 298073.1         | 4.93 (4.13-5.73)         | 1.34 (0.85-2.11) |
| Female                    | 20                    | 21939.9          | 9.12 (5.57-14.08)        | 104                            | 205291.9         | 5.07 (4.09-6.04)         | 1.80 (1.12-2.90) |
| Male                      | n < 10                | 9898.2           | 1.01 (0.03-5.63)         | 43                             | 92781.2          | 4.63 (3.25-6.02)         | 0.22 (0.03-1.58) |
| Age <40                   | n < 10                | 15537.6          | 5.15 (2.22-10.15)        | 71                             | 129908.1         | 5.47 (4.19-6.74)         | 0.94 (0.45-1.96) |
| Age 40-59                 | n < 10                | 13281.8          | 6.78 (3.10-12.86)        | 61                             | 132552.8         | 4.60 (3.45-5.76)         | 1.47 (0.73-2.96) |
| Age >= 60                 | n < 10                | 3018.7           | 13.25 (3.61-33.93)       | 15                             | 35612.2          | 4.21 (2.36-6.95)         | 3.15 (1.04-9.48) |
| <b>Cancer</b>             | 180                   | 30770.6          | 58.50 (49.95-67.04)      | 1657                           | 287073.1         | 57.72 (54.94-60.50)      | 1.01 (0.87-1.18) |
| Female                    | 123                   | 21148.6          | 58.16 (47.88-68.44)      | 1141                           | 196960.5         | 57.93 (54.57-61.29)      | 1.00 (0.83-1.21) |
| Male                      | 57                    | 9622.0           | 59.24 (43.86-74.62)      | 516                            | 90112.6          | 57.26 (52.32-62.20)      | 1.03 (0.79-1.36) |
| Age <40                   | 21                    | 15473.8          | 13.57 (8.40-20.75)       | 157                            | 129142.9         | 12.16 (10.26-14.06)      | 1.12 (0.71-1.76) |
| Age 40-59                 | 78                    | 12601.7          | 61.90 (48.16-75.63)      | 757                            | 127038.4         | 59.59 (55.34-63.83)      | 1.04 (0.82-1.31) |
| Age >= 60                 | 81                    | 2695.1           | 300.55 (235.09-366.00)   | 743                            | 30891.7          | 240.52 (223.22-257.81)   | 1.25 (0.99-1.57) |
| <b>Breast cancer</b>      | 28                    | 31806.2          | 8.80 (5.85-12.72)        | 342                            | 297237.6         | 11.51 (10.29-12.73)      | 0.77 (0.52-1.12) |
| Female                    | 28                    | 21802.7          | 12.84 (8.53-18.56)       | 340                            | 203601.2         | 16.70 (14.92-18.47)      | 0.77 (0.52-1.13) |
| Male                      | 0                     | 10003.5          | 0.00 (N/A)               | n < 10                         | 93636.4          | 0.21 (0.03-0.77)         | N/A              |
| Age <40                   | n < 10                | 15628.6          | 1.92 (0.40-5.61)         | 32                             | 130813.4         | 2.45 (1.60-3.29)         | 0.78 (0.24-2.56) |
| Age 40-59                 | 13                    | 13227.1          | 9.83 (5.23-16.81)        | 187                            | 131878.2         | 14.18 (12.15-16.21)      | 0.69 (0.40-1.22) |
| Age >= 60                 | 12                    | 2950.5           | 40.67 (21.02-71.04)      | 123                            | 34546.0          | 35.60 (29.31-41.90)      | 1.14 (0.63-2.07) |
| <b>Prostate cancer</b>    | 15                    | 32001.0          | 4.69 (2.62-7.73)         | 156                            | 299631.5         | 5.21 (4.39-6.02)         | 0.90 (0.53-1.53) |
| Female                    | 0                     | 22089.5          | 0.00 (N/A)               | 0                              | 206963.5         | 0.00 (N/A)               | N/A              |
| Male                      | 15                    | 9911.5           | 15.13 (8.47-24.96)       | 156                            | 92668.0          | 16.83 (14.19-19.48)      | 0.90 (0.53-1.53) |
| Age <40                   | 0                     | 15663.1          | 0.00 (N/A)               | n < 10                         | 131026.2         | 0.08 (0.00-0.43)         | N/A              |
| Age 40-59                 | n < 10                | 13316.8          | 5.26 (2.11-10.83)        | 41                             | 133477.3         | 3.07 (2.13-4.01)         | 1.71 (0.77-3.81) |



|                                                | MS-patients<br>N=6602 |                  |                           | MS-free individuals<br>N=61628 |                  |                          |                         |
|------------------------------------------------|-----------------------|------------------|---------------------------|--------------------------------|------------------|--------------------------|-------------------------|
|                                                | Events                | Person-<br>years | IR (95% CI) <sup>a</sup>  | Events                         | Person-<br>years | IR (95% CI) <sup>a</sup> | IRR (95% CI)            |
| Age >= 60                                      | n < 10                | 3021.1           | 26.48 (11.43-52.18)       | 114                            | 35128.0          | 32.45 (26.50-38.41)      | 0.82 (0.40-1.67)        |
| <b>Skin cancer</b>                             | 78                    | 31615.7          | 24.67 (19.20-30.15)       | 586                            | 296215.3         | 19.78 (18.18-21.38)      | 1.25 (0.98-1.58)        |
| Female                                         | 57                    | 21755.2          | 26.20 (19.40-33.00)       | 428                            | 203656.9         | 21.02 (19.02-23.01)      | 1.25 (0.95-1.64)        |
| Male                                           | 21                    | 9860.5           | 21.30 (13.18-32.55)       | 158                            | 92558.4          | 17.07 (14.41-19.73)      | 1.25 (0.79-1.97)        |
| Age <40                                        | n < 10                | 15621.3          | 3.84 (1.41-8.36)          | 61                             | 130462.3         | 4.68 (3.50-5.85)         | 0.82 (0.36-1.90)        |
| Age 40-59                                      | 33                    | 13146.6          | 25.10 (16.54-33.67)       | 271                            | 131584.5         | 20.60 (18.14-23.05)      | 1.22 (0.85-1.75)        |
| Age >= 60                                      | 39                    | 2847.8           | 136.95 (93.97-<br>179.93) | 254                            | 34168.5          | 74.34 (65.20-83.48)      | 1.84 (1.32-2.58)        |
| <b>Demyelinating disease<br/>other than MS</b> | 197                   | 24446.1          | 80.59 (69.33-91.84)       | n < 10                         | 300541.1         | 0.27 (0.11-0.52)         | 302.74 (149.30-613.86)  |
| Female                                         | 143                   | 16752.0          | 85.36 (71.37-99.35)       | n < 10                         | 206902.4         | 0.34 (0.14-0.70)         | 252.31 (118.15-538.82)  |
| Male                                           | 54                    | 7694.1           | 70.18 (51.46-88.90)       | n < 10                         | 93638.7          | 0.11 (0.00-0.60)         | 657.19 (90.91-4750.68)  |
| Age <40                                        | 102                   | 11603.1          | 87.91 (70.85-104.97)      | n < 10                         | 131016.8         | 0.23 (0.05-0.67)         | 383.91 (121.79-1210.20) |
| Age 40-59                                      | 80                    | 10482.5          | 76.32 (59.59-93.04)       | n < 10                         | 133730.1         | 0.30 (0.08-0.77)         | 255.15 (93.47-696.49)   |
| Age >= 60                                      | 15                    | 2360.5           | 63.55 (35.57-104.81)      | n < 10                         | 35794.2          | 0.28 (0.01-1.56)         | 227.46 (30.05-1722.03)  |
| <b>Epilepsy and seizure</b>                    | 40                    | 31563.9          | 12.67 (8.75-16.60)        | 161                            | 297879.4         | 5.40 (4.57-6.24)         | 2.34 (1.66-3.31)        |
| Female                                         | 26                    | 21712.9          | 11.97 (7.82-17.55)        | 98                             | 205095.7         | 4.78 (3.83-5.72)         | 2.51 (1.63-3.86)        |
| Male                                           | 14                    | 9851.0           | 14.21 (7.77-23.84)        | 63                             | 92783.6          | 6.79 (5.11-8.47)         | 2.09 (1.17-3.73)        |
| Age <40                                        | 15                    | 15400.7          | 9.74 (5.45-16.06)         | 53                             | 129774.2         | 4.08 (2.98-5.18)         | 2.38 (1.34-4.23)        |
| Age 40-59                                      | 16                    | 13164.0          | 12.15 (6.95-19.74)        | 69                             | 132608.4         | 5.20 (3.98-6.43)         | 2.34 (1.36-4.02)        |
| Age >= 60                                      | n < 10                | 2999.2           | 30.01 (13.72-56.96)       | 39                             | 35496.7          | 10.99 (7.54-14.44)       | 2.73 (1.32-5.64)        |
| <b>Depression</b>                              | 325                   | 29131.4          | 111.56 (99.43-<br>123.69) | 1326                           | 282469.4         | 46.94 (44.42-49.47)      | 2.38 (2.11-2.68)        |
| Female                                         | 228                   | 19936.3          | 114.36 (99.52-<br>129.21) | 979                            | 193005.4         | 50.72 (47.55-53.90)      | 2.25 (1.95-2.60)        |
| Male                                           | 97                    | 9195.1           | 105.49 (84.50-<br>126.48) | 347                            | 89464.0          | 38.79 (34.71-42.87)      | 2.72 (2.17-3.41)        |

|                                    | MS-patients<br>N=6602 |                  |                          | MS-free individuals<br>N=61628 |                  |                          |                  |
|------------------------------------|-----------------------|------------------|--------------------------|--------------------------------|------------------|--------------------------|------------------|
|                                    | Events                | Person-<br>years | IR (95% CI) <sup>a</sup> | Events                         | Person-<br>years | IR (95% CI) <sup>a</sup> | IRR (95% CI)     |
| Age <40                            | 166                   | 14084.4          | 117.86 (99.93-135.79)    | 670                            | 121757.7         | 55.03 (50.86-59.19)      | 2.14 (1.81-2.54) |
| Age 40-59                          | 126                   | 12216.9          | 103.14 (85.13-121.14)    | 550                            | 126076.6         | 43.62 (39.98-47.27)      | 2.36 (1.95-2.87) |
| Age ≥ 60                           | 33                    | 2830.1           | 116.60 (76.82-156.39)    | 106                            | 34635.2          | 30.60 (24.78-36.43)      | 3.81 (2.58-5.63) |
| <b>Anxiety</b>                     | 193                   | 30015.3          | 64.30 (55.23-73.37)      | 1470                           | 284539.2         | 51.66 (49.02-54.30)      | 1.24 (1.07-1.45) |
| Female                             | 141                   | 20531.3          | 68.68 (57.34-80.01)      | 1128                           | 194418.6         | 58.02 (54.63-61.41)      | 1.18 (0.99-1.41) |
| Male                               | 52                    | 9484.0           | 54.83 (39.93-69.73)      | 342                            | 90120.6          | 37.95 (33.93-41.97)      | 1.44 (1.08-1.93) |
| Age <40                            | 105                   | 14454.5          | 72.64 (58.75-86.54)      | 815                            | 121803.0         | 66.91 (62.32-71.51)      | 1.09 (0.89-1.33) |
| Age 40-59                          | 72                    | 12650.3          | 56.92 (43.77-70.06)      | 544                            | 127719.9         | 42.59 (39.01-46.17)      | 1.34 (1.05-1.71) |
| Age ≥ 60                           | 16                    | 2910.4           | 54.97 (31.42-89.28)      | 111                            | 35016.4          | 31.70 (25.80-37.60)      | 1.73 (1.03-2.93) |
| <b>Fatigue</b>                     | n < 10                | 32055.5          | 0.31 (0.01-1.74)         | 18                             | 300237.5         | 0.60 (0.36-0.95)         | 0.52 (0.07-3.90) |
| Female                             | n < 10                | 22053.1          | 0.45 (0.01-2.53)         | 15                             | 206665.0         | 0.73 (0.41-1.20)         | 0.62 (0.08-4.73) |
| Male                               | 0                     | 10002.5          | 0.00 (N/A)               | n < 10                         | 93572.6          | 0.32 (0.07-0.94)         | N/A              |
| Age <40                            | n < 10                | 15650.1          | 0.64 (0.02-3.56)         | n < 10                         | 130854.0         | 0.61 (0.26-1.20)         | 1.05 (0.13-8.36) |
| Age 40-59                          | 0                     | 13367.0          | 0.00 (N/A)               | 10                             | 133588.1         | 0.75 (0.36-1.38)         | N/A              |
| Age ≥ 60                           | 0                     | 3038.3           | 0.00 (N/A)               | 0                              | 35795.4          | 0.00 (N/A)               | N/A              |
| <b>Schizophrenia</b>               | 17                    | 31778.2          | 5.35 (3.12-8.57)         | 142                            | 297649.5         | 4.77 (3.99-5.56)         | 1.12 (0.68-1.85) |
| Female                             | 13                    | 21898.3          | 5.94 (3.16-10.15)        | 93                             | 205046.9         | 4.54 (3.61-5.46)         | 1.31 (0.73-2.34) |
| Male                               | n < 10                | 9879.9           | 4.05 (1.10-10.37)        | 49                             | 92602.6          | 5.29 (3.81-6.77)         | 0.77 (0.28-2.12) |
| Age <40                            | n < 10                | 15531.1          | 3.22 (1.05-7.51)         | 70                             | 129829.6         | 5.39 (4.13-6.65)         | 0.60 (0.24-1.48) |
| Age 40-59                          | 10                    | 13232.4          | 7.56 (3.62-13.90)        | 56                             | 132250.3         | 4.23 (3.13-5.34)         | 1.78 (0.91-3.50) |
| Age ≥ 60                           | n < 10                | 3014.6           | 6.63 (0.80-23.97)        | 16                             | 35569.6          | 4.50 (2.57-7.30)         | 1.47 (0.34-6.41) |
| <b>Bipolar affective disorders</b> | 37                    | 31694.7          | 11.67 (7.91-15.44)       | 273                            | 297921.5         | 9.16 (8.08-10.25)        | 1.27 (0.90-1.80) |
| Female                             | 32                    | 21791.6          | 14.68 (9.60-19.77)       | 218                            | 204860.8         | 10.64 (9.23-12.05)       | 1.38 (0.95-2.00) |
| Male                               | n < 10                | 9903.2           | 5.05 (1.64-11.78)        | 55                             | 93060.7          | 5.91 (4.35-7.47)         | 0.85 (0.34-2.13) |

|                                                  | MS-patients<br>N=6602 |                  |                            | MS-free individuals<br>N=61628 |                  |                            |                   |
|--------------------------------------------------|-----------------------|------------------|----------------------------|--------------------------------|------------------|----------------------------|-------------------|
|                                                  | Events                | Person-<br>years | IR (95% CI) <sup>a</sup>   | Events                         | Person-<br>years | IR (95% CI) <sup>a</sup>   | IRR (95% CI)      |
| Age <40                                          | 15                    | 15499.0          | 9.68 (5.42-15.96)          | 156                            | 129678.1         | 12.03 (10.14-13.92)        | 0.80 (0.47-1.37)  |
| Age 40-59                                        | 17                    | 13215.5          | 12.86 (7.49-20.60)         | 110                            | 132610.6         | 8.29 (6.74-9.85)           | 1.55 (0.93-2.58)  |
| Age ≥ 60                                         | n < 10                | 2980.3           | 16.78 (5.45-39.15)         | n < 10                         | 35632.7          | 1.96 (0.79-4.05)           | 8.54 (2.71-26.91) |
| <b>Fracture</b>                                  | 390                   | 27249.6          | 143.12 (128.92-<br>157.33) | 2846                           | 262547.8         | 108.40 (104.42-<br>112.38) | 1.32 (1.19-1.47)  |
| Female                                           | 274                   | 19087.8          | 143.55 (126.55-<br>160.54) | 1965                           | 183789.8         | 106.92 (102.19-<br>111.64) | 1.34 (1.18-1.52)  |
| Male                                             | 116                   | 8161.8           | 142.13 (116.26-<br>167.99) | 881                            | 78758.0          | 111.86 (104.47-<br>119.25) | 1.27 (1.05-1.54)  |
| Age <40                                          | 104                   | 13512.8          | 76.96 (62.17-91.76)        | 841                            | 114250.3         | 73.61 (68.64-78.59)        | 1.05 (0.85-1.28)  |
| Age 40-59                                        | 192                   | 11371.4          | 168.85 (144.96-<br>192.73) | 1328                           | 117928.9         | 112.61 (106.55-<br>118.67) | 1.50 (1.29-1.74)  |
| Age ≥ 60                                         | 94                    | 2365.4           | 397.40 (317.06-<br>477.74) | 677                            | 30368.5          | 222.93 (206.14-<br>239.72) | 1.78 (1.44-2.21)  |
| <b>Osteoporosis</b>                              | 34                    | 31826.3          | 10.68 (7.09-14.27)         | 181                            | 299157.3         | 6.05 (5.17-6.93)           | 1.77 (1.22-2.55)  |
| Female                                           | 28                    | 21863.0          | 12.81 (8.51-18.51)         | 163                            | 205650.5         | 7.93 (6.71-9.14)           | 1.62 (1.08-2.41)  |
| Male                                             | n < 10                | 9963.3           | 6.02 (2.21-13.11)          | 18                             | 93506.8          | 1.92 (1.14-3.04)           | 3.13 (1.24-7.88)  |
| Age <40                                          | 0                     | 15638.9          | 0.00 (N/A)                 | n < 10                         | 130930.3         | 0.46 (0.17-1.00)           | N/A               |
| Age 40-59                                        | 17                    | 13265.3          | 12.82 (7.47-20.52)         | 67                             | 133164.7         | 5.03 (3.83-6.24)           | 2.55 (1.50-4.34)  |
| Age ≥ 60                                         | 17                    | 2922.2           | 58.18 (33.89-93.14)        | 108                            | 35062.3          | 30.80 (24.99-36.61)        | 1.89 (1.13-3.15)  |
| <b>Viral liver disease<br/>(viral hepatitis)</b> | 12                    | 31974.9          | 3.75 (1.94-6.56)           | 110                            | 298158.1         | 3.69 (3.00-4.38)           | 1.02 (0.56-1.85)  |
| Female                                           | n < 10                | 22010.1          | 3.18 (1.28-6.55)           | 56                             | 205503.8         | 2.73 (2.01-3.44)           | 1.17 (0.53-2.56)  |
| Male                                             | n < 10                | 9964.8           | 5.02 (1.63-11.71)          | 54                             | 92654.3          | 5.83 (4.27-7.38)           | 0.86 (0.34-2.15)  |
| Age <40                                          | n < 10                | 15629.8          | 2.56 (0.70-6.55)           | 42                             | 130044.5         | 3.23 (2.25-4.21)           | 0.79 (0.28-2.21)  |
| Age 40-59                                        | n < 10                | 13310.8          | 6.01 (2.59-11.84)          | 56                             | 132353.0         | 4.23 (3.12-5.34)           | 1.42 (0.68-2.98)  |
| Age ≥ 60                                         | 0                     | 3034.3           | 0.00 (N/A)                 | 12                             | 35760.7          | 3.36 (1.73-5.86)           | N/A               |
| <b>Alcoholic liver disease</b>                   | n < 10                | 32077.8          | 0.94 (0.19-2.73)           | 50                             | 300396.7         | 1.66 (1.20-2.13)           | 0.56 (0.18-1.80)  |

|                                 | MS-patients<br>N=6602 |                  |                          | MS-free individuals<br>N=61628 |                  |                          |                   |
|---------------------------------|-----------------------|------------------|--------------------------|--------------------------------|------------------|--------------------------|-------------------|
|                                 | Events                | Person-<br>years | IR (95% CI) <sup>a</sup> | Events                         | Person-<br>years | IR (95% CI) <sup>a</sup> | IRR (95% CI)      |
| Female                          | n < 10                | 22085.6          | 0.45 (0.01-2.52)         | 24                             | 206871.0         | 1.16 (0.74-1.73)         | 0.39 (0.05-2.89)  |
| Male                            | n < 10                | 9992.2           | 2.00 (0.24-7.23)         | 26                             | 93525.7          | 2.78 (1.82-4.07)         | 0.72 (0.17-3.03)  |
| Age <40                         | 0                     | 15663.1          | 0.00 (N/A)               | 0                              | 131028.6         | 0.00 (N/A)               | N/A               |
| Age 40-59                       | n < 10                | 13377.4          | 2.24 (0.46-6.55)         | 32                             | 133604.4         | 2.40 (1.57-3.23)         | 0.94 (0.29-3.06)  |
| Age ≥ 60                        | 0                     | 3037.4           | 0.00 (N/A)               | 18                             | 35763.6          | 5.03 (2.98-7.95)         | N/A               |
| <b>Chronic liver disease /</b>  |                       |                  |                          |                                |                  |                          |                   |
| <b>cirrhosis</b>                | n < 10                | 32041.4          | 0.62 (0.08-2.25)         | 45                             | 300219.2         | 1.50 (1.06-1.94)         | 0.42 (0.10-1.72)  |
| Female                          | n < 10                | 22053.3          | 0.45 (0.01-2.53)         | 27                             | 206706.3         | 1.31 (0.86-1.90)         | 0.35 (0.05-2.55)  |
| Male                            | n < 10                | 9988.0           | 1.00 (0.03-5.58)         | 18                             | 93512.9          | 1.92 (1.14-3.04)         | 0.52 (0.07-3.90)  |
| Age <40                         | n < 10                | 15647.8          | 1.28 (0.15-4.62)         | n < 10                         | 130954.5         | 0.23 (0.05-0.67)         | 5.58 (0.93-33.39) |
| Age 40-59                       | 0                     | 13356.3          | 0.00 (N/A)               | 22                             | 133492.0         | 1.65 (1.03-2.50)         | N/A               |
| Age ≥ 60                        | 0                     | 3037.4           | 0.00 (N/A)               | 20                             | 35772.7          | 5.59 (3.42-8.63)         | N/A               |
| <b>Acute liver disease or</b>   |                       |                  |                          |                                |                  |                          |                   |
| <b>failure</b>                  | n < 10                | 32085.1          | 0.94 (0.19-2.73)         | 35                             | 300528.8         | 1.16 (0.78-1.55)         | 0.80 (0.25-2.61)  |
| Female                          | n < 10                | 22081.7          | 0.91 (0.11-3.27)         | 15                             | 206911.9         | 0.72 (0.41-1.20)         | 1.25 (0.29-5.46)  |
| Male                            | n < 10                | 10003.5          | 1.00 (0.03-5.57)         | 20                             | 93617.0          | 2.14 (1.30-3.30)         | 0.47 (0.06-3.49)  |
| Age <40                         | n < 10                | 15660.4          | 0.64 (0.02-3.56)         | n < 10                         | 131006.4         | 0.15 (0.02-0.55)         | 4.18 (0.38-46.13) |
| Age 40-59                       | n < 10                | 13379.5          | 0.75 (0.02-4.16)         | 22                             | 133721.6         | 1.65 (1.03-2.49)         | 0.45 (0.06-3.37)  |
| Age ≥ 60                        | n < 10                | 3045.3           | 3.28 (0.08-18.30)        | 11                             | 35800.9          | 3.07 (1.53-5.50)         | 1.07 (0.14-8.28)  |
| <b>Toxic liver disease</b>      |                       |                  |                          |                                |                  |                          |                   |
|                                 | n < 10                | 32066.9          | 1.56 (0.51-3.64)         | 15                             | 300443.2         | 0.50 (0.28-0.82)         | 3.12 (1.14-8.59)  |
| Female                          | n < 10                | 22065.9          | 1.81 (0.49-4.64)         | 11                             | 206838.5         | 0.53 (0.27-0.95)         | 3.41 (1.09-10.70) |
| Male                            | n < 10                | 10001.0          | 1.00 (0.03-5.57)         | n < 10                         | 93604.6          | 0.43 (0.12-1.09)         | 2.34 (0.26-20.94) |
| Age <40                         | n < 10                | 15662.4          | 0.64 (0.02-3.56)         | n < 10                         | 130978.8         | 0.38 (0.12-0.89)         | 1.67 (0.20-14.32) |
| Age 40-59                       | n < 10                | 13369.1          | 2.99 (0.82-7.66)         | n < 10                         | 133688.8         | 0.37 (0.12-0.87)         | 8.00 (2.15-29.79) |
| Age ≥ 60                        | 0                     | 3035.4           | 0.00 (N/A)               | n < 10                         | 35775.6          | 1.40 (0.45-3.26)         | N/A               |
| <b>Liver diseases without</b>   |                       |                  |                          |                                |                  |                          |                   |
| <b>viral or alcoholic cause</b> | 15                    | 31984.5          | 4.69 (2.62-7.74)         | 99                             | 299659.0         | 3.30 (2.65-3.95)         | 1.42 (0.82-2.44)  |
| Female                          | 11                    | 22026.0          | 4.99 (2.49-8.94)         | 64                             | 206358.4         | 3.10 (2.34-3.86)         | 1.61 (0.85-3.05)  |

|           | <b>MS-patients<br/>N=6602</b> |                          |                                | <b>MS-free individuals<br/>N=61628</b> |                          |                                |                     |
|-----------|-------------------------------|--------------------------|--------------------------------|----------------------------------------|--------------------------|--------------------------------|---------------------|
|           | <b>Events</b>                 | <b>Person-<br/>years</b> | <b>IR (95% CI)<sup>a</sup></b> | <b>Events</b>                          | <b>Person-<br/>years</b> | <b>IR (95% CI)<sup>a</sup></b> | <b>IRR (95% CI)</b> |
| Male      | n < 10                        | 9958.4                   | 4.02 (1.09-10.28)              | 35                                     | 93300.5                  | 3.75 (2.51-4.99)               | 1.07 (0.38-3.01)    |
| Age <40   | n < 10                        | 15614.6                  | 4.48 (1.80-9.24)               | 20                                     | 130767.2                 | 1.53 (0.93-2.36)               | 2.93 (1.24-6.93)    |
| Age 40-59 | n < 10                        | 13345.1                  | 4.50 (1.65-9.79)               | 47                                     | 133238.4                 | 3.53 (2.52-4.54)               | 1.27 (0.54-2.98)    |
| Age >= 60 | n < 10                        | 3024.8                   | 6.61 (0.80-23.89)              | 32                                     | 35653.3                  | 8.98 (5.87-12.09)              | 0.74 (0.18-3.07)    |

<sup>a</sup>Per 10,000 person-years, **crude IR and IRR**. CI: confidence interval; IR: incidence rate; IRR: incidence rate ratio; MACE: major adverse cardiovascular events; N/A: not applicable

**Supplemental Table 2. The risk of incident cardiovascular comorbidity (with no history of CV diseases (CVD) or CVD risk factors), stratified by sex and age, after diagnosis of multiple sclerosis (MS) compared with MS-free matched individuals, in a national, register-based cohort study in Sweden 2008-2016**

|                                         | MS patients<br>N=4539 |                  |                          | MS-free matched individuals<br>N=47527 |                  |                          |                   |
|-----------------------------------------|-----------------------|------------------|--------------------------|----------------------------------------|------------------|--------------------------|-------------------|
|                                         | Events                | Person-<br>years | IR (95% CI) <sup>a</sup> | Events                                 | Person-<br>years | IR (95% CI) <sup>a</sup> | IRR (95% CI)      |
| <b>MACE</b>                             | 32                    | 21835.6          | 14.65 (9.58-19.73)       | 234                                    | 227902.9         | 10.27 (8.95-11.58)       | 1.43 (0.99-2.07)  |
| Female                                  | 20                    | 15017.7          | 13.32 (8.13-20.57)       | 112                                    | 155220.0         | 7.22 (5.88-8.55)         | 1.85 (1.15-2.97)  |
| Male                                    | 12                    | 6817.8           | 17.60 (9.09-30.75)       | 122                                    | 72682.9          | 16.79 (13.81-19.76)      | 1.05 (0.58-1.90)  |
| Age <40                                 | n < 10                | 12344.3          | 4.05 (1.32-9.45)         | 19                                     | 113019.3         | 1.68 (1.01-2.63)         | 2.41 (0.90-6.45)  |
| Age 40-59                               | 14                    | 8391.7           | 16.68 (9.12-27.99)       | 124                                    | 98316.1          | 12.61 (10.39-14.83)      | 1.32 (0.76-2.30)  |
| Age ≥ 60                                | 13                    | 1099.5           | 118.23 (62.95-202.18)    | 91                                     | 16567.5          | 54.93 (43.64-66.21)      | 2.15 (1.20-3.85)  |
| <b>Myocardial infarction</b>            | 16                    | 21875.9          | 7.31 (4.18-11.88)        | 102                                    | 228231.3         | 4.47 (3.60-5.34)         | 1.64 (0.97-2.77)  |
| Female                                  | n < 10                | 15041.2          | 5.98 (2.74-11.36)        | 34                                     | 155381.4         | 2.19 (1.45-2.92)         | 2.73 (1.31-5.70)  |
| Male                                    | n < 10                | 6834.7           | 10.24 (4.12-21.10)       | 68                                     | 72849.9          | 9.33 (7.12-11.55)        | 1.10 (0.50-2.39)  |
| Age <40                                 | n < 10                | 12361.8          | 1.62 (0.20-5.84)         | n < 10                                 | 113089.2         | 0.18 (0.02-0.64)         | 9.15 (1.29-64.95) |
| Age 40-59                               | n < 10                | 8402.7           | 8.33 (3.35-17.16)        | 52                                     | 98543.1          | 5.28 (3.84-6.71)         | 1.58 (0.72-3.48)  |
| Age ≥ 60                                | n < 10                | 1111.4           | 62.98 (25.32-129.77)     | 48                                     | 16599.0          | 28.92 (20.74-37.10)      | 2.18 (0.99-4.81)  |
| <b>Stroke, hemorrhagic and ischemic</b> | 16                    | 21887.0          | 7.31 (4.18-11.87)        | 133                                    | 228177.4         | 5.83 (4.84-6.82)         | 1.25 (0.75-2.11)  |
| Female                                  | 11                    | 15044.7          | 7.31 (3.65-13.08)        | 78                                     | 155313.2         | 5.02 (3.91-6.14)         | 1.46 (0.77-2.74)  |
| Male                                    | n < 10                | 6842.3           | 7.31 (2.37-17.05)        | 55                                     | 72864.3          | 7.55 (5.55-9.54)         | 0.97 (0.39-2.42)  |
| Age <40                                 | n < 10                | 12352.6          | 2.43 (0.50-7.10)         | 16                                     | 113036.5         | 1.42 (0.81-2.30)         | 1.72 (0.50-5.89)  |
| Age 40-59                               | n < 10                | 8421.1           | 8.31 (3.34-17.13)        | 73                                     | 98505.7          | 7.41 (5.71-9.11)         | 1.12 (0.52-2.44)  |
| Age ≥ 60                                | n < 10                | 1113.3           | 53.89 (19.78-117.30)     | 44                                     | 16635.2          | 26.45 (18.63-34.27)      | 2.04 (0.87-4.78)  |
| <b>Transient Ischemic attack</b>        | 13                    | 21882.5          | 5.94 (3.16-10.16)        | 62                                     | 228328.1         | 2.72 (2.04-3.39)         | 2.19 (1.20-3.98)  |
| Female                                  | 11                    | 15026.5          | 7.32 (3.65-13.10)        | 38                                     | 155378.0         | 2.45 (1.67-3.22)         | 2.99 (1.53-5.86)  |
| Male                                    | n < 10                | 6856.0           | 2.92 (0.35-10.54)        | 24                                     | 72950.1          | 3.29 (2.11-4.90)         | 0.89 (0.21-3.75)  |
| Age <40                                 | n < 10                | 12336.9          | 3.24 (0.88-8.30)         | n < 10                                 | 113085.0         | 0.53 (0.19-1.15)         | 6.11 (1.72-21.66) |

|                                                                 | MS patients<br>N=4539 |                  |                          | MS-free matched individuals<br>N=47527 |                  |                          |                   |
|-----------------------------------------------------------------|-----------------------|------------------|--------------------------|----------------------------------------|------------------|--------------------------|-------------------|
|                                                                 | Events                | Person-<br>years | IR (95% CI) <sup>a</sup> | Events                                 | Person-<br>years | IR (95% CI) <sup>a</sup> | IRR (95% CI)      |
| Age 40-59                                                       | n < 10                | 8408.0           | 8.33 (3.35-17.15)        | 28                                     | 98647.2          | 2.84 (1.89-4.10)         | 2.93 (1.28-6.71)  |
| Age ≥ 60                                                        | n < 10                | 1137.5           | 17.58 (2.13-63.51)       | 28                                     | 16595.9          | 16.87 (11.21-24.38)      | 1.04 (0.25-4.37)  |
| <b>Angina pectoris &amp; unspecified ischemic heart disease</b> |                       |                  |                          |                                        |                  |                          |                   |
|                                                                 | n < 10                | 21915.3          | 3.65 (1.58-7.19)         | 107                                    | 228183.3         | 4.69 (3.80-5.58)         | 0.78 (0.38-1.60)  |
| Female                                                          | n < 10                | 15063.7          | 1.99 (0.41-5.82)         | 44                                     | 155347.9         | 2.83 (2.00-3.67)         | 0.70 (0.22-2.26)  |
| Male                                                            | n < 10                | 6851.6           | 7.30 (2.37-17.03)        | 63                                     | 72835.4          | 8.65 (6.51-10.79)        | 0.84 (0.34-2.10)  |
| Age <40                                                         | 0                     | 12370.1          | 0.00 (N/A)               | n < 10                                 | 113069.5         | 0.27 (0.05-0.78)         | N/A               |
| Age 40-59                                                       | n < 10                | 8419.2           | 7.13 (2.62-15.51)        | 52                                     | 98562.0          | 5.28 (3.84-6.71)         | 1.35 (0.58-3.14)  |
| Age ≥ 60                                                        | n < 10                | 1126.0           | 17.76 (2.15-64.16)       | 52                                     | 16551.8          | 31.42 (22.88-39.96)      | 0.57 (0.14-2.32)  |
| <b>Heart failure</b>                                            |                       |                  |                          |                                        |                  |                          |                   |
|                                                                 | 13                    | 21892.6          | 5.94 (3.16-10.15)        | 76                                     | 228287.3         | 3.33 (2.58-4.08)         | 1.78 (0.99-3.21)  |
| Female                                                          | n < 10                | 15055.8          | 3.99 (1.46-8.67)         | 37                                     | 155383.1         | 2.38 (1.61-3.15)         | 1.67 (0.71-3.97)  |
| Male                                                            | n < 10                | 6836.8           | 10.24 (4.12-21.10)       | 39                                     | 72904.1          | 5.35 (3.67-7.03)         | 1.91 (0.86-4.28)  |
| Age <40                                                         | n < 10                | 12353.6          | 3.24 (0.88-8.29)         | n < 10                                 | 113080.0         | 0.80 (0.36-1.51)         | 4.07 (1.25-13.21) |
| Age 40-59                                                       | n < 10                | 8420.3           | 5.94 (1.93-13.86)        | 39                                     | 98590.8          | 3.96 (2.71-5.20)         | 1.50 (0.59-3.81)  |
| Age ≥ 60                                                        | n < 10                | 1118.7           | 35.76 (9.74-91.55)       | 28                                     | 16616.5          | 16.85 (11.20-24.35)      | 2.12 (0.74-6.05)  |
| <b>Venous thromboembolism</b>                                   |                       |                  |                          |                                        |                  |                          |                   |
|                                                                 | 44                    | 21804.3          | 20.18 (14.22-26.14)      | 307                                    | 227747.8         | 13.48 (11.97-14.99)      | 1.50 (1.09-2.05)  |
| Female                                                          | 32                    | 14969.5          | 21.38 (13.97-28.78)      | 206                                    | 154980.0         | 13.29 (11.48-15.11)      | 1.61 (1.11-2.33)  |
| Male                                                            | 12                    | 6834.8           | 17.56 (9.07-30.67)       | 101                                    | 72767.8          | 13.88 (11.17-16.59)      | 1.26 (0.70-2.30)  |
| Age <40                                                         | 11                    | 12301.7          | 8.94 (4.46-16.00)        | 88                                     | 112738.2         | 7.81 (6.17-9.44)         | 1.15 (0.61-2.14)  |
| Age 40-59                                                       | 22                    | 8351.4           | 26.34 (16.51-39.88)      | 154                                    | 98383.8          | 15.65 (13.18-18.13)      | 1.68 (1.08-2.63)  |
| Age ≥ 60                                                        | 11                    | 1151.3           | 95.55 (47.70-170.96)     | 65                                     | 16625.7          | 39.10 (29.59-48.60)      | 2.44 (1.29-4.63)  |
| <b>Peripheral vascular disease</b>                              |                       |                  |                          |                                        |                  |                          |                   |
|                                                                 | n < 10                | 21913.3          | 3.19 (1.28-6.58)         | 39                                     | 228407.8         | 1.71 (1.17-2.24)         | 1.87 (0.84-4.18)  |
| Female                                                          | n < 10                | 15058.6          | 2.66 (0.72-6.80)         | 27                                     | 155406.7         | 1.74 (1.14-2.53)         | 1.53 (0.53-4.37)  |
| Male                                                            | n < 10                | 6854.7           | 4.38 (0.90-12.79)        | 12                                     | 73001.1          | 1.64 (0.85-2.87)         | 2.66 (0.75-9.43)  |
| Age <40                                                         | n < 10                | 12360.1          | 1.62 (0.20-5.85)         | 11                                     | 113053.4         | 0.97 (0.49-1.74)         | 1.66 (0.37-7.50)  |

|                                                   | MS patients<br>N=4539 |                  |                          | MS-free matched individuals<br>N=47527 |                  |                          |                   |
|---------------------------------------------------|-----------------------|------------------|--------------------------|----------------------------------------|------------------|--------------------------|-------------------|
|                                                   | Events                | Person-<br>years | IR (95% CI) <sup>a</sup> | Events                                 | Person-<br>years | IR (95% CI) <sup>a</sup> | IRR (95% CI)      |
| Age 40-59                                         | n < 10                | 8415.0           | 3.57 (0.74-10.42)        | 16                                     | 98697.1          | 1.62 (0.93-2.63)         | 2.20 (0.64-7.55)  |
| Age ≥ 60                                          | n < 10                | 1138.2           | 17.57 (2.13-63.48)       | 12                                     | 16657.3          | 7.20 (3.72-12.58)        | 2.44 (0.55-10.90) |
| <b>Pericardial disease</b>                        | n < 10                | 21904.3          | 2.74 (1.01-5.96)         | 35                                     | 228411.3         | 1.53 (1.02-2.04)         | 1.79 (0.75-4.25)  |
| Female                                            | n < 10                | 15067.7          | 1.33 (0.16-4.79)         | 16                                     | 155435.2         | 1.03 (0.59-1.67)         | 1.29 (0.30-5.61)  |
| Male                                              | n < 10                | 6836.6           | 5.85 (1.59-14.98)        | 19                                     | 72976.1          | 2.60 (1.57-4.07)         | 2.25 (0.76-6.61)  |
| Age <40                                           | n < 10                | 12346.3          | 1.62 (0.20-5.85)         | 10                                     | 113071.7         | 0.88 (0.42-1.63)         | 1.83 (0.40-8.36)  |
| Age 40-59                                         | n < 10                | 8433.3           | 3.56 (0.73-10.40)        | 17                                     | 98693.6          | 1.72 (1.00-2.76)         | 2.07 (0.61-7.05)  |
| Age ≥ 60                                          | n < 10                | 1124.7           | 8.89 (0.23-49.54)        | n < 10                                 | 16646.0          | 4.81 (2.07-9.47)         | 1.85 (0.23-14.79) |
| <b>Bradycardia and heart<br/>block</b>            | n < 10                | 21912.0          | 3.19 (1.28-6.58)         | 26                                     | 228455.6         | 1.14 (0.74-1.67)         | 2.81 (1.22-6.47)  |
| Female                                            | n < 10                | 15058.8          | 2.66 (0.72-6.80)         | 11                                     | 155456.0         | 0.71 (0.35-1.27)         | 3.75 (1.20-11.79) |
| Male                                              | n < 10                | 6853.1           | 4.38 (0.90-12.79)        | 15                                     | 72999.5          | 2.05 (1.15-3.39)         | 2.13 (0.62-7.36)  |
| Age <40                                           | n < 10                | 12356.7          | 2.43 (0.50-7.10)         | n < 10                                 | 113089.3         | 0.35 (0.10-0.91)         | 6.86 (1.54-30.67) |
| Age 40-59                                         | n < 10                | 8433.2           | 2.37 (0.29-8.57)         | n < 10                                 | 98731.7          | 0.91 (0.42-1.73)         | 2.60 (0.56-12.04) |
| Age ≥ 60                                          | n < 10                | 1122.0           | 17.82 (2.16-64.39)       | 13                                     | 16634.5          | 7.82 (4.16-13.36)        | 2.28 (0.51-10.11) |
| <b>Paroxysmal tachycardia</b>                     | n < 10                | 21907.4          | 4.11 (1.88-7.80)         | 93                                     | 228231.3         | 4.07 (3.25-4.90)         | 1.01 (0.51-2.00)  |
| Female                                            | n < 10                | 15056.7          | 3.98 (1.46-8.67)         | 69                                     | 155261.9         | 4.44 (3.40-5.49)         | 0.90 (0.39-2.07)  |
| Male                                              | n < 10                | 6850.6           | 4.38 (0.90-12.80)        | 24                                     | 72969.4          | 3.29 (2.11-4.89)         | 1.33 (0.40-4.42)  |
| Age <40                                           | n < 10                | 12352.5          | 4.05 (1.31-9.45)         | 26                                     | 112991.9         | 2.30 (1.50-3.37)         | 1.76 (0.68-4.58)  |
| Age 40-59                                         | n < 10                | 8429.7           | 4.75 (1.29-12.15)        | 46                                     | 98599.6          | 4.67 (3.32-6.01)         | 1.02 (0.37-2.83)  |
| Age ≥ 60                                          | 0                     | 1125.2           | 0.00 (N/A)               | 21                                     | 16639.7          | 12.62 (7.81-19.29)       | N/A               |
| <b>Atrial fibrillation and<br/>atrial flutter</b> | 14                    | 21890.0          | 6.40 (3.50-10.73)        | 190                                    | 228022.5         | 8.33 (7.15-9.52)         | 0.77 (0.45-1.32)  |
| Female                                            | n < 10                | 15057.6          | 3.98 (1.46-8.67)         | 81                                     | 155284.2         | 5.22 (4.08-6.35)         | 0.76 (0.33-1.75)  |
| Male                                              | n < 10                | 6832.5           | 11.71 (5.06-23.07)       | 109                                    | 72738.3          | 14.99 (12.17-17.80)      | 0.78 (0.38-1.60)  |
| Age <40                                           | n < 10                | 12350.5          | 2.43 (0.50-7.10)         | 13                                     | 113051.0         | 1.15 (0.61-1.97)         | 2.11 (0.60-7.41)  |
| Age 40-59                                         | n < 10                | 8401.0           | 5.95 (1.93-13.89)        | 80                                     | 98439.4          | 8.13 (6.35-9.91)         | 0.73 (0.30-1.81)  |
| Age ≥ 60                                          | n < 10                | 1138.6           | 52.70 (19.34-114.70)     | 97                                     | 16532.1          | 58.67 (47.00-70.35)      | 0.90 (0.39-2.05)  |



|                          | MS patients<br>N=4539 |                  |                          | MS-free matched individuals<br>N=47527 |                  |                          |                  |
|--------------------------|-----------------------|------------------|--------------------------|----------------------------------------|------------------|--------------------------|------------------|
|                          | Events                | Person-<br>years | IR (95% CI) <sup>a</sup> | Events                                 | Person-<br>years | IR (95% CI) <sup>a</sup> | IRR (95% CI)     |
| <b>Other arrhythmias</b> | 16                    | 21886.0          | 7.31 (4.18-11.87)        | 161                                    | 228032.1         | 7.06 (5.97-8.15)         | 1.04 (0.62-1.73) |
| Female                   | 12                    | 15033.1          | 7.98 (4.12-13.94)        | 119                                    | 155111.2         | 7.67 (6.29-9.05)         | 1.04 (0.57-1.88) |
| Male                     | n < 10                | 6852.9           | 5.84 (1.59-14.94)        | 42                                     | 72920.9          | 5.76 (4.02-7.50)         | 1.01 (0.36-2.83) |
| Age <40                  | n < 10                | 12347.8          | 4.05 (1.31-9.45)         | 49                                     | 112892.1         | 4.34 (3.13-5.56)         | 0.93 (0.37-2.34) |
| Age 40-59                | n < 10                | 8421.0           | 9.50 (4.10-18.72)        | 87                                     | 98503.0          | 8.83 (6.98-10.69)        | 1.08 (0.52-2.22) |
| Age ≥ 60                 | n < 10                | 1117.1           | 26.85 (5.54-78.48)       | 25                                     | 16637.0          | 15.03 (9.72-22.18)       | 1.79 (0.54-5.92) |

<sup>a</sup>Per 10,000 person-years, crude IR and IRR. CI: confidence interval; IR: incidence rate; IRR: incidence rate ratio; MACE: major adverse cardiovascular events; N/A: not applicable

**Supplemental Table 3a. Hospitalizations after diagnosis of multiple sclerosis (MS) compared with MS-free matched individuals, stratified by sex and age, in a national, register-based cohort study in Sweden 2008-2016**

|                                 | MS patients<br>N=6602 |              |                           | MS-free matched individuals<br>N=61828 |              |                           |                  |
|---------------------------------|-----------------------|--------------|---------------------------|----------------------------------------|--------------|---------------------------|------------------|
|                                 | Events                | Person-years | IR (95% CI) <sup>a</sup>  | Events                                 | Person-years | IR (95% CI) <sup>a</sup>  | IRR (95% CI)     |
| <b>Cause of hospitalization</b> |                       |              |                           |                                        |              |                           |                  |
| <b>All hospitalizations</b>     | 3414                  | 18499.5      | 1845.45 (1783.55-1907.36) | 18242                                  | 239082.5     | 763.00 (751.93-774.07)    | 2.42 (2.33-2.51) |
| Female                          | 2391                  | 12632.2      | 1892.79 (1816.92-1968.66) | 14221                                  | 158542.9     | 896.98 (882.24-911.72)    | 2.11 (2.02-2.20) |
| Male                            | 1023                  | 5867.4       | 1743.54 (1636.70-1850.38) | 4021                                   | 80539.6      | 499.26 (483.83-514.69)    | 3.49 (3.26-3.74) |
| Age <40                         | 1673                  | 8118.2       | 2060.81 (1962.05-2159.56) | 8896                                   | 104738.4     | 849.35 (831.70-867.00)    | 2.43 (2.30-2.56) |
| Age 40-59                       | 1295                  | 8366.5       | 1547.84 (1463.54-1632.14) | 6220                                   | 109291.4     | 569.12 (554.98-583.26)    | 2.72 (2.56-2.89) |
| Age >= 60                       | 446                   | 2014.8       | 2213.57 (2008.13-2419.01) | 3126                                   | 25052.7      | 1247.77 (1204.03-1291.51) | 1.77 (1.61-1.96) |
| <b>MS-related</b>               | 1982                  | 23576.9      | 840.65 (803.64-877.66)    | 0                                      | 300614.2     | 0.00 (N/A)                | N/A              |
| Female                          | 1342                  | 16343.2      | 821.14 (777.20-865.07)    | 0                                      | 206963.5     | 0.00 (N/A)                | N/A              |
| Male                            | 640                   | 7233.8       | 884.74 (816.19-953.29)    | 0                                      | 93650.6      | 0.00 (N/A)                | N/A              |
| Age <40                         | 1060                  | 10264.3      | 1032.71 (970.54-1094.88)  | 0                                      | 136087.3     | 0.00 (N/A)                | N/A              |
| Age 40-59                       | 752                   | 10335.7      | 727.57 (675.57-779.57)    | 0                                      | 130084.3     | 0.00 (N/A)                | N/A              |
| Age >= 60                       | 170                   | 2976.9       | 571.06 (485.22-656.91)    | 0                                      | 34442.6      | 0.00 (N/A)                | N/A              |
| <b>Cardiovascular-related</b>   | 138                   | 31697.6      | 43.54 (36.27-50.80)       | 1205                                   | 297147.2     | 40.55 (38.26-42.84)       | 1.07 (0.90-1.28) |
| Female                          | 81                    | 21864.0      | 37.05 (28.98-45.12)       | 639                                    | 205152.7     | 31.15 (28.73-33.56)       | 1.19 (0.94-1.50) |
| Male                            | 57                    | 9833.7       | 57.96 (42.92-73.01)       | 566                                    | 91994.5      | 61.53 (56.46-66.59)       | 0.94 (0.72-1.24) |
| Age <40                         | 13                    | 14872.7      | 8.74 (4.65-14.95)         | 87                                     | 135767.3     | 6.41 (5.06-7.75)          | 1.36 (0.76-2.44) |
| Age 40-59                       | 61                    | 13374.6      | 45.61 (34.16-57.05)       | 459                                    | 128512.9     | 35.72 (32.45-38.98)       | 1.28 (0.98-1.67) |
| Age >= 60                       | 64                    | 3450.3       | 185.49 (140.05-230.94)    | 659                                    | 32867.0      | 200.51 (185.20-215.81)    | 0.93 (0.72-1.20) |

<sup>a</sup>Per 10,000 person-years. CI: confidence interval; IR: incidence rate; IRR: incidence rate ratio; N/A: not applicable

**Supplemental Table 3b. Mortality after diagnosis of multiple sclerosis (MS) compared with MS-free matched individuals, stratified by sex and age, in a nationwide, register-based cohort study in Sweden 2008-2016**

| Cause of death               | MS patients<br>N=6602 |              |                          | MS-free matched individuals<br>N=61828 |              |                          | IRR (95% CI)     |
|------------------------------|-----------------------|--------------|--------------------------|----------------------------------------|--------------|--------------------------|------------------|
|                              | Cases                 | Person-years | IR (95% CI) <sup>a</sup> | Cases                                  | Person-years | IR (95% CI) <sup>a</sup> |                  |
| <b>All-cause deaths</b>      | 109                   | 32093.0      | 33.96 (27.59-40.34)      | 663                                    | 300614.2     | 22.05 (20.38-23.73)      | 1.54 (1.26-1.89) |
| Female                       | 61                    | 22089.5      | 27.61 (20.68-34.55)      | 362                                    | 206963.5     | 17.49 (15.69-19.29)      | 1.58 (1.20-2.07) |
| Male                         | 48                    | 10003.5      | 47.98 (34.41-61.56)      | 301                                    | 93650.6      | 32.14 (28.51-35.77)      | 1.49 (1.10-2.02) |
| Age <40                      | n < 10                | 15663.1      | 3.19 (1.04-7.45)         | 57                                     | 141124.4     | 4.04 (2.99-5.09)         | 0.79 (0.32-1.97) |
| Age 40-59                    | 36                    | 13305.6      | 27.06 (18.22-35.89)      | 196                                    | 128904.2     | 15.21 (13.08-17.33)      | 1.78 (1.25-2.54) |
| Age ≥ 60                     | 68                    | 3124.3       | 217.65 (165.92-269.38)   | 410                                    | 30585.5      | 134.05 (121.07-147.03)   | 1.62 (1.26-2.10) |
| <b>Cardiovascular deaths</b> | 11                    | 32093.0      | 3.43 (1.71-6.13)         | 54                                     | 300614.2     | 1.80 (1.32-2.28)         | 1.91 (1.00-3.65) |
| Female                       | n < 10                | 22089.5      | 3.62 (1.56-7.14)         | 21                                     | 206963.5     | 1.01 (0.63-1.55)         | 3.57 (1.58-8.06) |
| Male                         | n < 10                | 10003.5      | 3.00 (0.62-8.76)         | 33                                     | 93650.6      | 3.52 (2.32-4.73)         | 0.85 (0.26-2.78) |
| Age <40                      | 0                     | 15663.1      | 0.00 (N/A)               | n < 10                                 | 141124.4     | 0.21 (0.04-0.62)         | N/A              |
| Age 40-59                    | n < 10                | 13305.6      | 3.76 (1.22-8.77)         | 15                                     | 128904.2     | 1.16 (0.65-1.92)         | 3.23 (1.17-8.89) |
| Age ≥ 60                     | n < 10                | 3124.3       | 19.20 (7.05-41.80)       | 36                                     | 30585.5      | 11.77 (7.93-15.62)       | 1.63 (0.69-3.87) |
| <b>Cancer-related deaths</b> | 27                    | 32093.0      | 8.41 (5.54-12.24)        | 254                                    | 300614.2     | 8.45 (7.41-9.49)         | 1.00 (0.67-1.48) |
| Female                       | 19                    | 22089.5      | 8.60 (5.18-13.43)        | 155                                    | 206963.5     | 7.49 (6.31-8.67)         | 1.15 (0.71-1.85) |
| Male                         | n < 10                | 10003.5      | 8.00 (3.45-15.76)        | 99                                     | 93650.6      | 10.57 (8.49-12.65)       | 0.76 (0.37-1.55) |
| Age <40                      | n < 10                | 15663.1      | 1.92 (0.39-5.60)         | 12                                     | 141124.4     | 0.85 (0.44-1.49)         | 2.25 (0.64-7.98) |
| Age 40-59                    | n < 10                | 13305.6      | 6.76 (3.09-12.84)        | 80                                     | 128904.2     | 6.21 (4.85-7.57)         | 1.09 (0.55-2.17) |
| Age ≥ 60                     | 15                    | 3124.3       | 48.01 (26.87-79.19)      | 162                                    | 30585.5      | 52.97 (44.81-61.12)      | 0.91 (0.53-1.54) |
| <b>MS-related deaths</b>     | 30                    | 32093.0      | 9.35 (6.00-12.69)        | 0                                      | 300614.2     | 0.00 (N/A)               | N/A              |
| Female                       | 15                    | 22089.5      | 6.79 (3.80-11.20)        | 0                                      | 206963.5     | 0.00 (N/A)               | N/A              |
| Male                         | 15                    | 10003.5      | 14.99 (8.39-24.73)       | 0                                      | 93650.6      | 0.00 (N/A)               | N/A              |
| Age <40                      | n < 10                | 15663.1      | 0.64 (0.02-3.56)         | 0                                      | 141124.4     | 0.00 (N/A)               | N/A              |
| Age 40-59                    | n < 10                | 13305.6      | 6.01 (2.60-11.85)        | 0                                      | 128904.2     | 0.00 (N/A)               | N/A              |

| Cause of death | MS patients<br>N=6602 |              |                          | MS-free matched individuals<br>N=61828 |              |                          |                   |
|----------------|-----------------------|--------------|--------------------------|----------------------------------------|--------------|--------------------------|-------------------|
|                | Cases                 | Person-years | IR (95% CI) <sup>a</sup> | Cases                                  | Person-years | IR (95% CI) <sup>a</sup> | IRR (95% CI)      |
| Age ≥ 60       | 21                    | 3124.3       | 67.22 (41.61-102.75)     | 0                                      | 30585.5      | 0.00 (N/A)               | N/A               |
| <b>Suicide</b> | n < 10                | 32093.0      | 2.49 (1.08-4.91)         | 29                                     | 300614.2     | 0.96 (0.65-1.39)         | 2.58 (1.18-5.65)  |
| Female         | n < 10                | 22089.5      | 1.81 (0.49-4.64)         | 14                                     | 206963.5     | 0.68 (0.37-1.13)         | 2.68 (0.88-8.13)  |
| Male           | n < 10                | 10003.5      | 4.00 (1.09-10.24)        | 15                                     | 93650.6      | 1.60 (0.90-2.64)         | 2.50 (0.83-7.52)  |
| Age <40        | n < 10                | 15663.1      | 0.64 (0.02-3.56)         | 11                                     | 141124.4     | 0.78 (0.39-1.39)         | 0.82 (0.11-6.34)  |
| Age 40-59      | n < 10                | 13305.6      | 3.01 (0.82-7.70)         | 13                                     | 128904.2     | 1.01 (0.54-1.72)         | 2.98 (0.97-9.14)  |
| Age ≥ 60       | n < 10                | 3124.3       | 9.60 (1.98-28.06)        | n < 10                                 | 30585.5      | 1.63 (0.53-3.81)         | 5.87 (1.40-24.58) |

<sup>a</sup>Per 10,000 person-years, crude IR and IRR. CI: confidence interval; IR: incidence rate; IRR: incidence rate ratio; N/A: not applicable

## Supplemental Appendix A

### ICD-10 codes for non-infectious comorbidity in multiple sclerosis in a national, register-based cohort study in Sweden 2008-2016

| <u>Category of comorbidity</u>                                  | <u>ICD-10 code</u>        |
|-----------------------------------------------------------------|---------------------------|
| <u>Cardiovascular disease</u>                                   |                           |
| <u>Myocardial infarction<sup>1</sup></u>                        | <u>I21, I22</u>           |
| <u>Stroke, hemorrhagic, and ischemic<sup>1</sup></u>            | <u>I61, I63, I64</u>      |
| <u>Transient ischemic attack (TIA)</u>                          | <u>G45.8, G45.9</u>       |
| <u>Angina pectoris &amp; unspecified ischemic heart disease</u> | <u>I20</u>                |
| <u>Heart failure</u>                                            | <u>I50</u>                |
| <u>Venous thromboembolism</u>                                   | <u>I26, I80, I81, I82</u> |

**ICD-10 codes for non-infectious comorbidity in multiple sclerosis in a national, register-based cohort study in Sweden 2008-2016**

| <b><u>Category of comorbidity</u></b>         | <b><u>ICD-10 code</u></b> |
|-----------------------------------------------|---------------------------|
| <u>Peripheral vascular disease</u>            | <u>I73</u>                |
| <u>Pericardial disease</u>                    | <u>I30, I31</u>           |
| <u>Bradycardia and heart block</u>            | <u>I44</u>                |
| <u>Paroxysmal tachycardia</u>                 | <u>I47</u>                |
| <u>Atrial fibrillation and atrial flutter</u> | <u>I48</u>                |
| <u>Other cardiac arrhythmias</u>              | <u>I49</u>                |
| <u>Sudden death<sup>1</sup></u>               | <u>I46.1, R96</u>         |
| <b><u>Non-cardiovascular disease</u></b>      |                           |
| <u>Autoimmune disease</u>                     | <u>M30-M36</u>            |
| <u>Bladder dysfunction, neuromuscular</u>     | <u>N31</u>                |
| <u>Optic neuritis</u>                         | <u>H46</u>                |
| <u>Chronic renal disease</u>                  | <u>I68.8, N18, N19</u>    |
| <u>Diabetes Type I</u>                        | <u>E10</u>                |
| <u>Diabetes Type II</u>                       | <u>E11</u>                |
| <u>Dyslipidemia</u>                           | <u>E78</u>                |
| <u>Retinal disorders</u>                      | <u>H35, H36</u>           |
| <u>Asthma</u>                                 | <u>J45, J46</u>           |
| <u>Chronic obstructive pulmonary disease</u>  | <u>J44</u>                |
| <u>Bowel dysfunction</u>                      | <u>K58, K59, R14</u>      |
| <u>Crohn disease</u>                          | <u>K50</u>                |
| <u>Ulcerative colitis</u>                     | <u>K51</u>                |
| <u>Cancer</u>                                 | <u>C00-C97</u>            |
| <u>Breast cancer</u>                          | <u>C50</u>                |
| <u>Prostate cancer</u>                        | <u>C61</u>                |
| <u>Skin cancer</u>                            | <u>C43-44</u>             |
| <u>Demyelinating disease other than MS</u>    | <u>G36-G37</u>            |

**ICD-10 codes for non-infectious comorbidity in multiple sclerosis in a national, register-based cohort study in Sweden 2008-2016**

| <b><u>Category of comorbidity</u></b>                  | <b><u>ICD-10 code</u></b>                                                   |
|--------------------------------------------------------|-----------------------------------------------------------------------------|
| <u>Epilepsy and seizure</u>                            | <u>G40</u>                                                                  |
| <u>Depression</u>                                      | <u>F32-F34</u>                                                              |
| <u>Anxiety</u>                                         | <u>F40, F41</u>                                                             |
| <u>Fatigue</u>                                         | <u>F48</u>                                                                  |
| <u>Schizophrenia</u>                                   | <u>F20-F29</u>                                                              |
| <u>Biopolar affective disorders</u>                    | <u>F31</u>                                                                  |
| <u>Fracture</u>                                        | <u>S02, S12, S22, S32, S42, S52, S62, S72, S82, S92, T02, T08, T10, T12</u> |
| <u>Osteoporosis</u>                                    | <u>M80-M81</u>                                                              |
| <u>Viral liver disease (viral hepatitis)</u>           | <u>B15-B19</u>                                                              |
| <u>Alcoholic liver disease</u>                         | <u>K70</u>                                                                  |
| <u>Chronic liver disease / cirrhosis</u>               | <u>K73, K74</u>                                                             |
| <u>Acute liver disease or failure</u>                  | <u>K72</u>                                                                  |
| <u>Toxic liver disease</u>                             | <u>K71</u>                                                                  |
| <u>Liver diseases without viral or alcoholic cause</u> | <u>K75, K76</u>                                                             |

<sup>1</sup>Included in major adverse cardiovascular events (MACE) outcome.

**ICD-10 codes for cause of death in multiple sclerosis in a national, register-based cohort study in Sweden 2008-2016**

| <b><u>Category of cause of death</u></b> | <b><u>ICD-10 code</u></b> |
|------------------------------------------|---------------------------|
| <u>MS</u>                                | <u>G35</u>                |

|                                       |                                                                                                                     |
|---------------------------------------|---------------------------------------------------------------------------------------------------------------------|
| <a href="#"><u>Cardiovascular</u></a> | <a href="#"><u>I21, I22, I64, G45.8, G45.9, I20, I50, I26, I80, I81, I82, I73, I30, I31, I44, I47, I48, I49</u></a> |
| <a href="#"><u>Cancer</u></a>         | <a href="#"><u>C00-C97</u></a>                                                                                      |
| <a href="#"><u>Suicide</u></a>        | <a href="#"><u>Z91.5</u></a>                                                                                        |

---
